# Supplementary material for: Gate-controlled multi-bit nonvolatile ferroelectric organic transistor memory on paper substrates
Source: Royal Society of Chemistry journal article supplement (doi:10.1039/c9tc04356j), 2019-01-01
Supplement: c9tc04356j2.pdf [file c9tc04356j2.pdf]

## Supporting Information

### **Gate-controlled multi-bit nonvolatile ferroelectric organic transistor memory on paper substrates**

Meili Xu, Xindong Zhang, Shizhang Li, Ting Xu, Wenfa Xie and Wei Wang\*

College of Electronic Science and Engineering, Jilin University, 2699 Qianjin Street, Changchun  
130012, China

\* E-mail: [wwei99@jlu.edu.cn](mailto:wwei99@jlu.edu.cn)

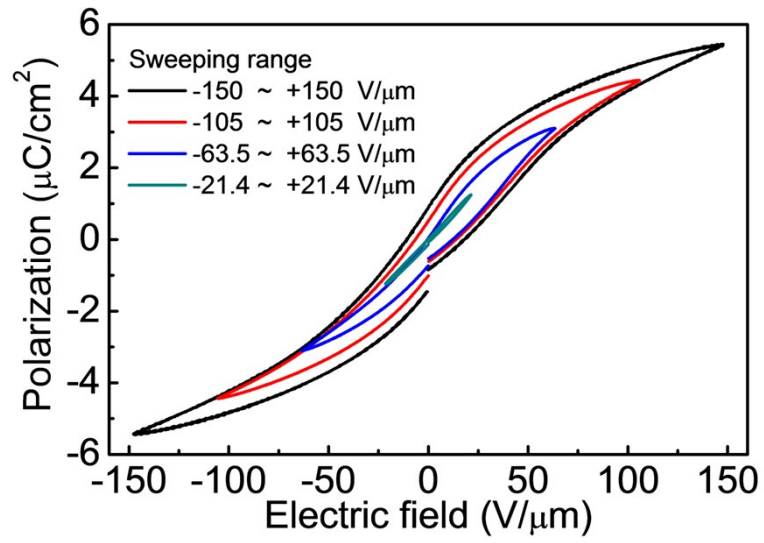

**Figure S1.** Polarization-electric field hysteresis properties of Al/P(VDF-TrFE-CTFE)/Au ferroelectric capacitors at different sweeping voltage ranges.

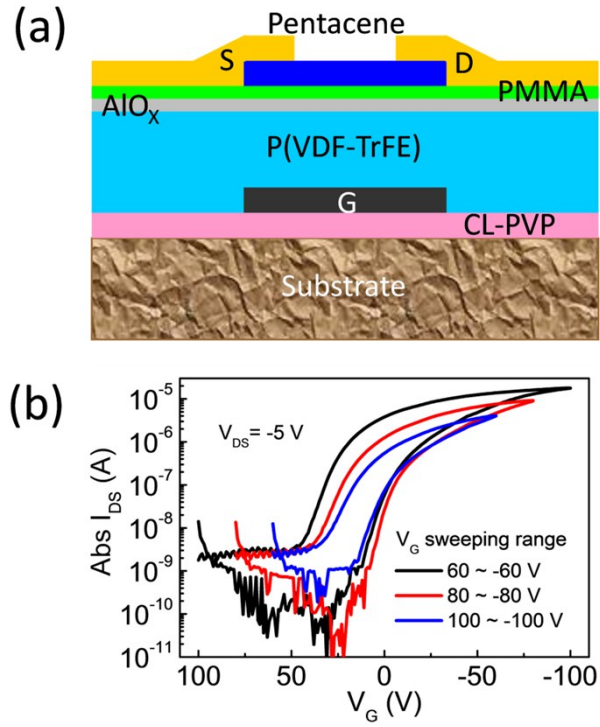

**Figure S2.** (a) Schematic diagram and (b)  $I_{DS} - V_G$  transfer characteristics of the OFET with conventional P(VDF-TrFE) as the ferroelectric gate dielectric.

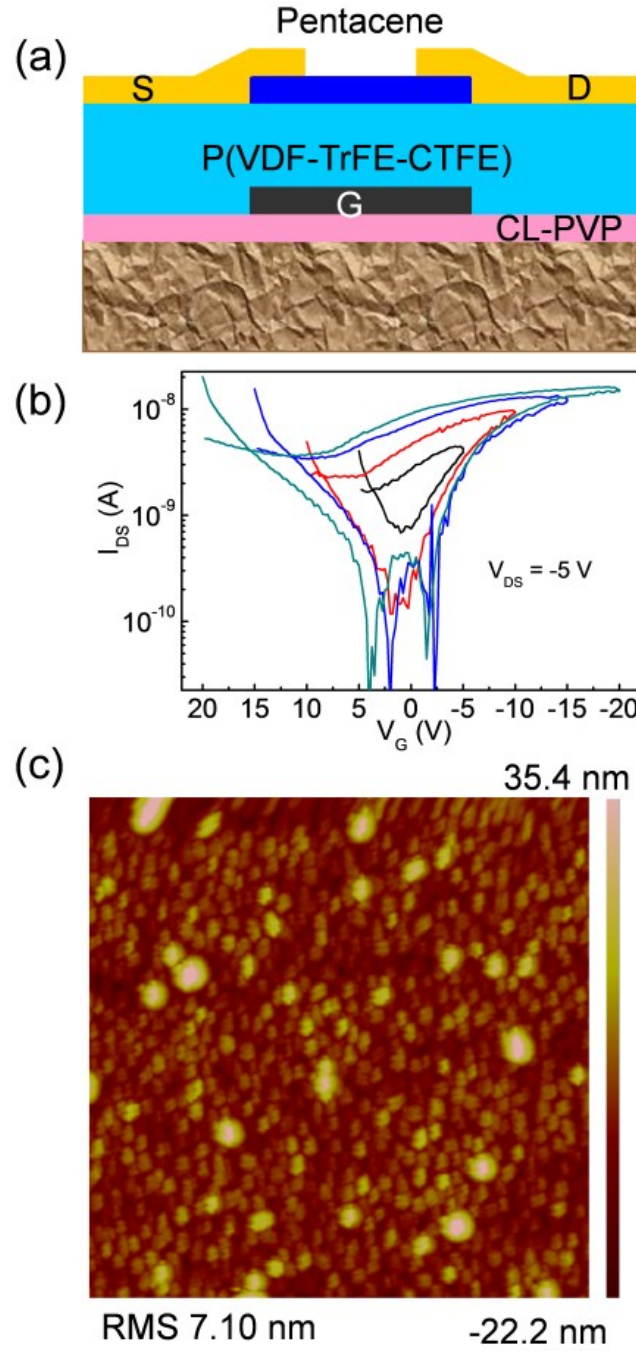

**Figure S3.** (a) Schematic diagram of the OFET<sub>-Ref 1</sub>. (b)  $I_{DS} - V_G$  transfer characteristics of the OFET<sub>-Ref 1</sub> at various  $V_G$  sweeping ranges. (c) AFM image of pentacene film deposited on the surface of P(VDF-TrFE-CTFE) film.

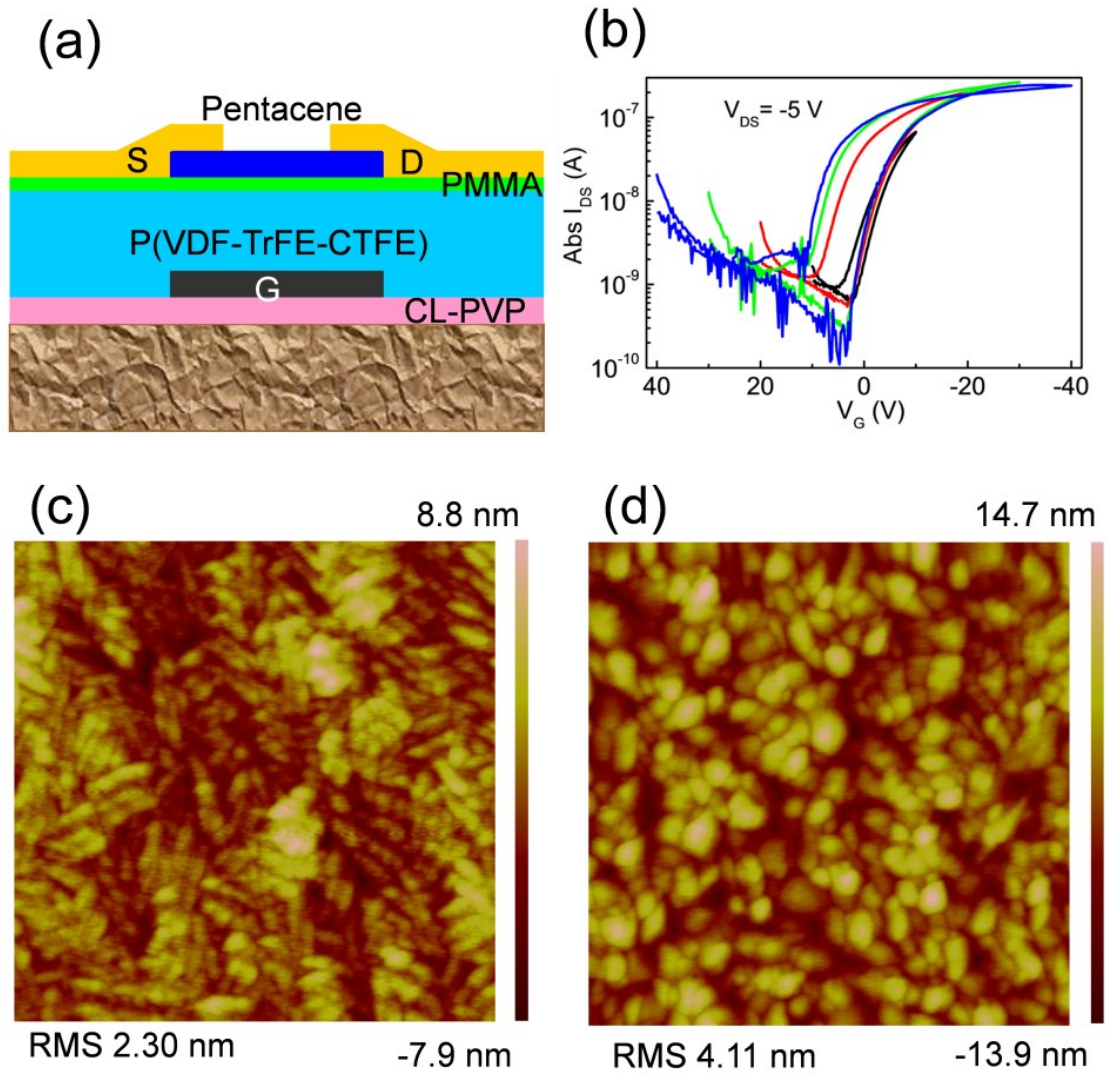

**Figure S4.** (a) Schematic diagram of the OFET-Ref 2. (b)  $I_{DS} - V_G$  transfer characteristics of the OFET-Ref 2 at various  $V_G$  sweeping ranges. AFM images of (c) PMMA film spin-coated on the surface of P(VDF-TrFE-CTFE) film and (d) pentacene film deposited on the surface of the discontinuous PMMA film.

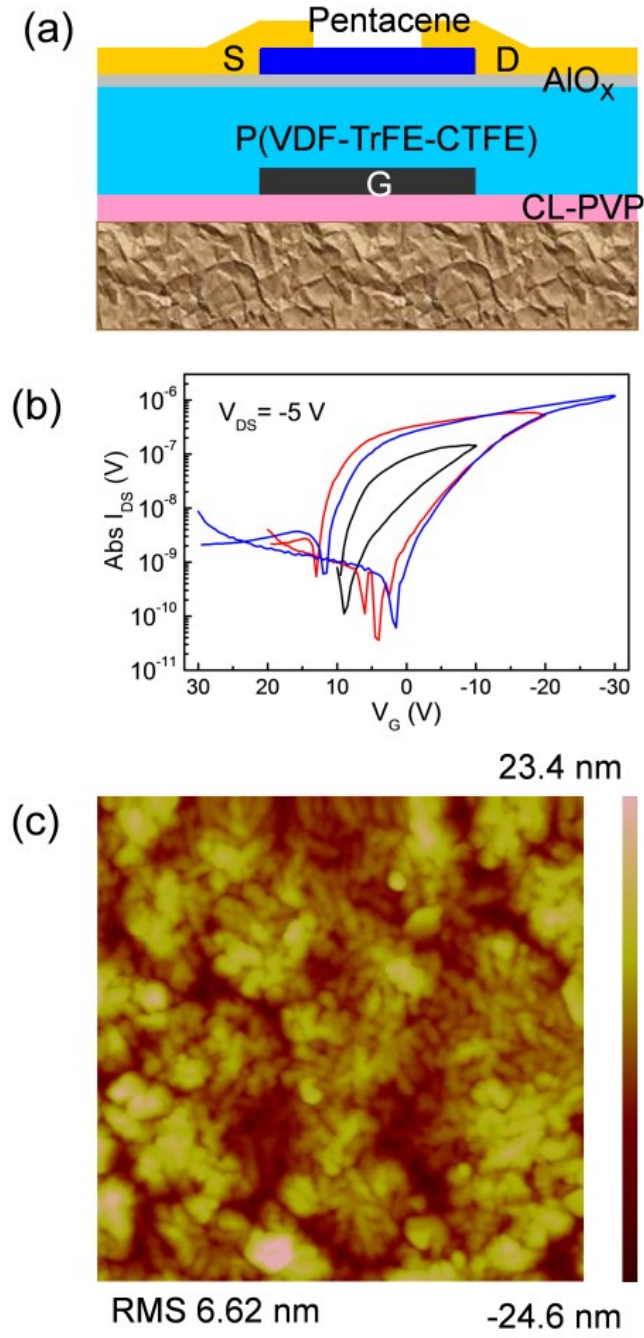

**Figure S5.** (a) Schematic diagram of the OFET-Ref 3. (b)  $I_{\text{DS}} - V_{\text{G}}$  transfer characteristics of the OFET-Ref 3 at various  $V_{\text{G}}$  sweeping ranges. AFM images of (c) pentacene film deposited on the surface of  $\text{AlO}_x$  buffer layer.

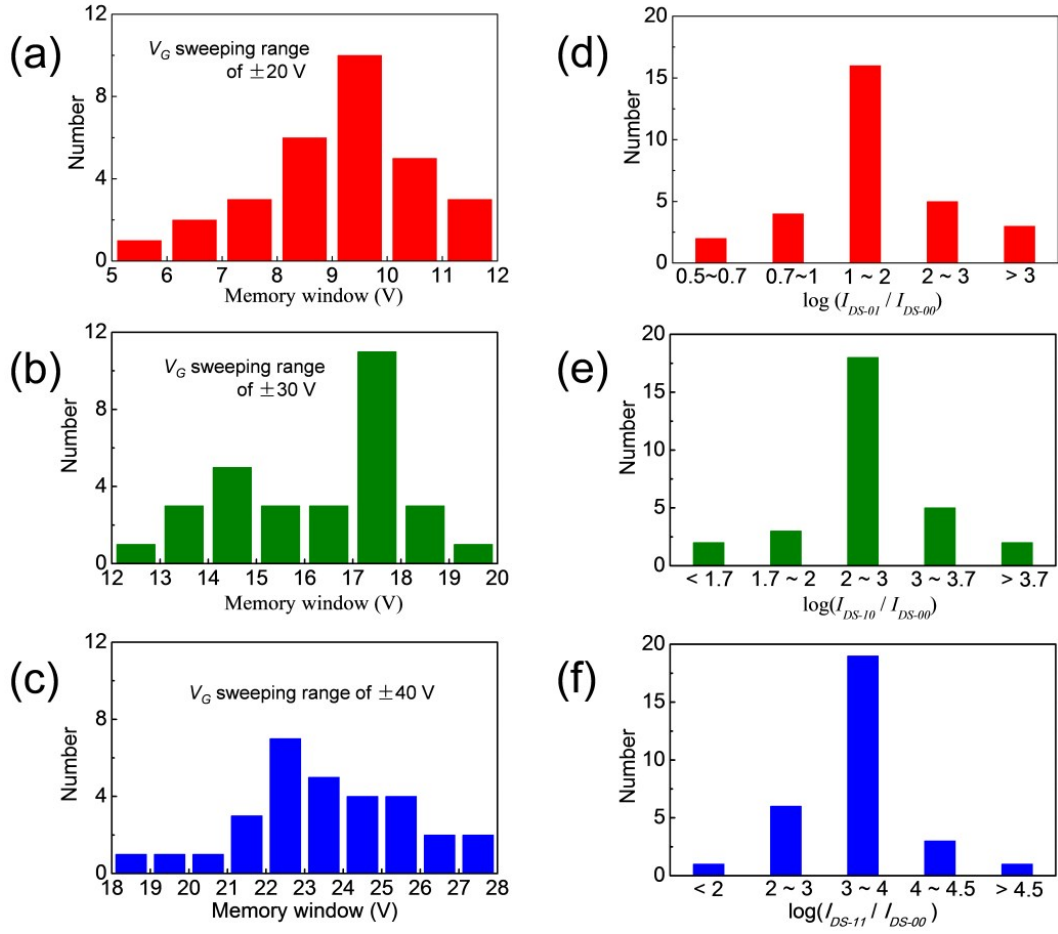

**Figure S6.** Statistical device population with the memory window extracted at the  $V_G$  sweeping ranges of (a)  $\pm 20$ , (b)  $\pm 30$ , and (c)  $\pm 40$  V, and with the memory on/off ratio on the log scale extracted at the  $V_G$  sweeping ranges of (d)  $\pm 20$ , (e)  $\pm 30$ , and (f)  $\pm 40$  V, obtained from a total of 30 paper-based multi-bit NVMs.



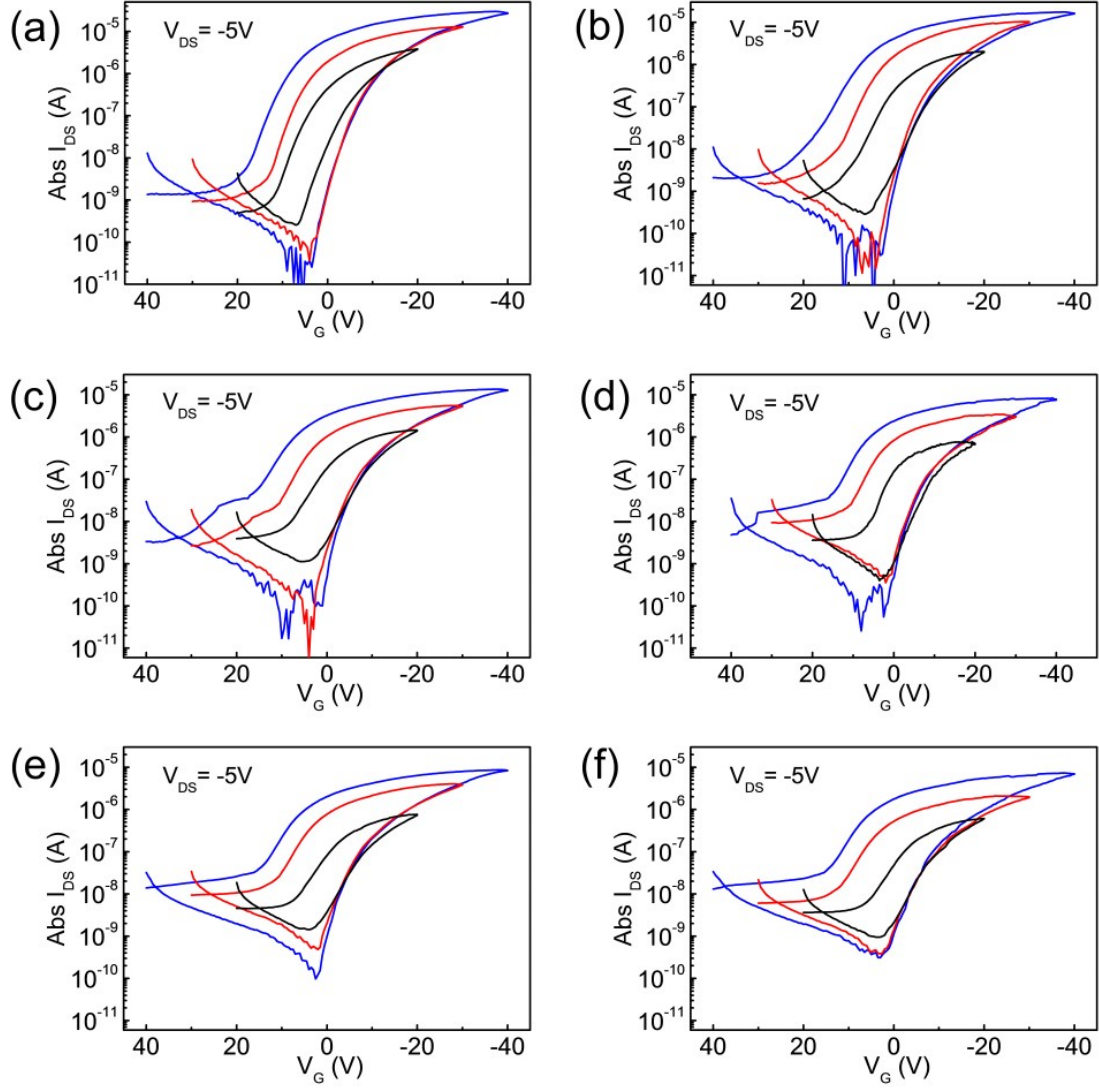

**Figure S7.** Transfer characteristics of a multi-bit OFET-NVM on paper substrate after implementing (a) 0, (b) 20, (c) 60, (d) 100, (e) 150, and (f) 200 bending cycles at a tensile  $r$  of 10 mm.



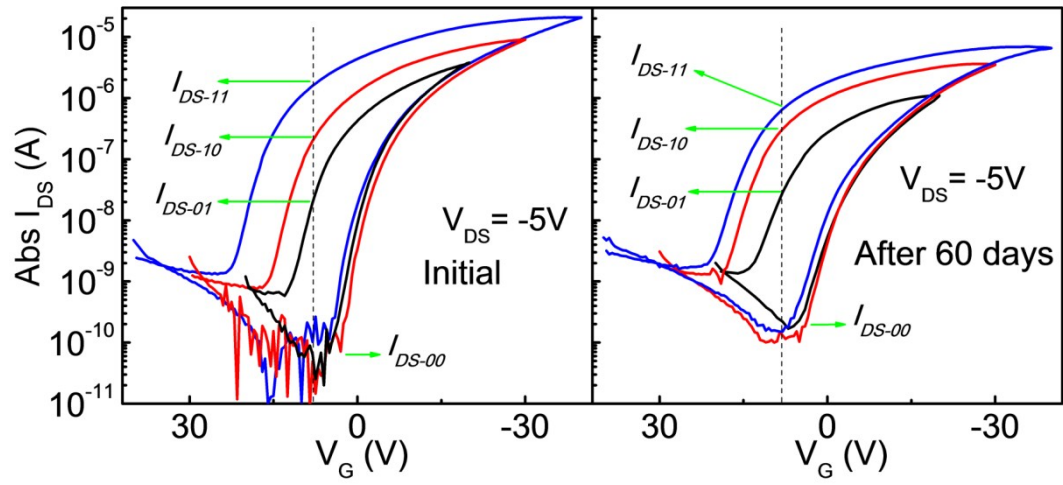

**Figure S8.** Transfer characteristics of a multi-bit OFET memory measured at its initial period and after 60 days, respectively

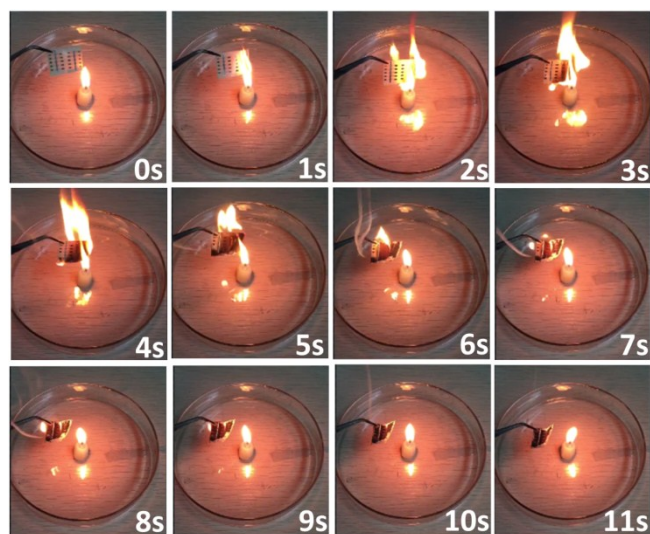

**Figure S9.** Physical destruction of our 2-bit OFET-NVMs on paper substrate using incineration.

Table S1. Summary of the mobility,  $\Delta V_T$  and memory on/off ratio of the multi-bit OFET-NVMs operating at different conditions.

| Testing conditions        |     | Mobility<br>(cm <sup>2</sup> V <sup>-1</sup> s <sup>-1</sup> ) | $V_G \sim \pm 40$ V |                         | $V_G \sim \pm 30$ V |                         | $V_G \sim \pm 20$ V |                         |
|---------------------------|-----|----------------------------------------------------------------|---------------------|-------------------------|---------------------|-------------------------|---------------------|-------------------------|
|                           |     |                                                                | $\Delta V_T$<br>(V) | Memory<br>on/off ratio* | $\Delta V_T$<br>(V) | Memory<br>on/off ratio* | $\Delta V_T$<br>(V) | Memory<br>on/off ratio* |
| Bending<br>radius<br>(mm) | 50  | 0.89                                                           | 27.1                | $5.4 \times 10^3$       | 17.2                | $3.4 \times 10^2$       | 9.2                 | $3.2 \times 10^1$       |
|                           | 40  | 0.85                                                           | 25.1                | $3.8 \times 10^3$       | 15.8                | $1.8 \times 10^2$       | 8.5                 | $1.6 \times 10^1$       |
|                           | 30  | 0.73                                                           | 25.3                | $3.0 \times 10^3$       | 16.2                | $3.8 \times 10^2$       | 8.6                 | $1.2 \times 10^1$       |
|                           | 20  | 0.61                                                           | 24.2                | $1.8 \times 10^3$       | 16.1                | $3.6 \times 10^2$       | 8.5                 | $1.2 \times 10^1$       |
|                           | 10  | 0.54                                                           | 24.1                | $2.8 \times 10^3$       | 15.8                | $1.0 \times 10^2$       | 8.4                 | $0.92 \times 10^1$      |
|                           | 4   | 0.22                                                           | 23.8                | $9.5 \times 10^3$       | 14.1                | $1.4 \times 10^2$       | 8.2                 | $1.1 \times 10^1$       |
| Humidity                  | 50% | 0.91                                                           | 28.7                | $2.8 \times 10^4$       | 19.7                | $6.6 \times 10^3$       | 10.6                | $1.4 \times 10^2$       |
|                           | 58% | 0.74                                                           | 26.9                | $7.2 \times 10^3$       | 19.3                | $4.5 \times 10^3$       | 10.4                | $7.4 \times 10^1$       |
|                           | 67% | 0.66                                                           | 26.1                | $3.1 \times 10^3$       | 18.6                | $4.7 \times 10^3$       | 9.8                 | $2.5 \times 10^1$       |
|                           | 75% | 0.42                                                           | 25.9                | $6.5 \times 10^2$       | 19.1                | $2.0 \times 10^3$       | 10.1                | $3.3 \times 10^1$       |
|                           | 83% | 0.34                                                           | 25.3                | $7.0 \times 10^2$       | 18.4                | $2.1 \times 10^2$       | 10.7                | $1.7 \times 10^1$       |
| Temperature<br>(°C)       | 26  | 0.36                                                           | 25.0                | $1.2 \times 10^3$       | 17.9                | $1.9 \times 10^2$       | 9.6                 | $1.3 \times 10^1$       |
|                           | 50  | 0.30                                                           | 20.2                | $4.6 \times 10^2$       | 15.1                | $2.0 \times 10^2$       | 7.4                 | $1.5 \times 10^1$       |
|                           | 60  | 0.19                                                           | 19.7                | $4.4 \times 10^2$       | 14.8                | $1.2 \times 10^2$       | 6.5                 | $9.0 \times 10^0$       |
|                           | 80  | 0.18                                                           | 19.5                | $2.9 \times 10^2$       | 13.9                | $2.4 \times 10^1$       | 6.1                 | $3.4 \times 10^0$       |
|                           | 100 | 0.11                                                           | 19.3                | $2.2 \times 10^4$       | 13.6                | $9.1 \times 10^2$       | 5.8                 | $7.5 \times 10^0$       |

\* The memory on/off ratio was extracted at the  $V_G$  of 5 V.
